# Supplementary material for: Internal Stress-Free Phosphoric Acid Doped Polybenzimidazole Membranes for High Temperature Proton Exchange Membrane Fuel Cells
Source: Research Square preprint supplement (doi:10.21203/rs.3.rs-6141669/v1), 2025-03-24
Supplement: Supplementary file 1 [file 3d0a2808f0c174f6e3c1f121.docx]

**Internal Stress-Free Phosphoric Acid Doped Polybenzimidazole Membranes for High Temperature Proton Exchange Membrane Fuel Cells**

Guoliang Liu, 1, 2, ⊥ Shiying Tu, 1, 3, ⊥ Ailian Wang, 4 Hongfei Pan, 1, 3, 5 Wenxi Ji, 4 Longgui Zhang, 4 Taoyi Zhang, 4 Haining Zhang, 1, 3, * Haoling Tang 1, 3, 5, *

1 State Key Laboratory of Advanced Technology for Materials Synthesis and Processing, Wuhan University of Technology, Nr. 122 Luoshi Rd., Wuhan 430070, China

2 School of Chemistry and Material Science, Hubei Engineering University, Xiaogan, Hubei 432000, China

3 National Energy Key Laboratory for New Hydrogen-Ammonia Energy Technologies, Foshan Xianhu Laboratory, Foshan 528200, China

4 Sinopec (Beijing) Research Institute of Chemical Industry Co. Ltd, Beijing 100013, China

5 Hubei Key Laboratory of Fuel Cell Technology, Wuhan University of Technology, Wuhan 430070, China

⊥These authors contributed equally

*Correspondence: [haining.zhang@whut.edu.cn](mailto:haining.zhang@whut.edu.cn), [thln@whut.edu.cn](mailto:thln@whut.edu.cn)

**SUPPLEMENTARY FIGURES**

**Figure S1 Characterization of polymer.** 1H NMR (**a**) and FT-IR (**b**) of poly(4,4’-diphenylether-5,5’-bibenzimidazole). Molecular weight distribution (c) and TGA (d) curves of the synthesized OPBI in this work and commercial OPBI.


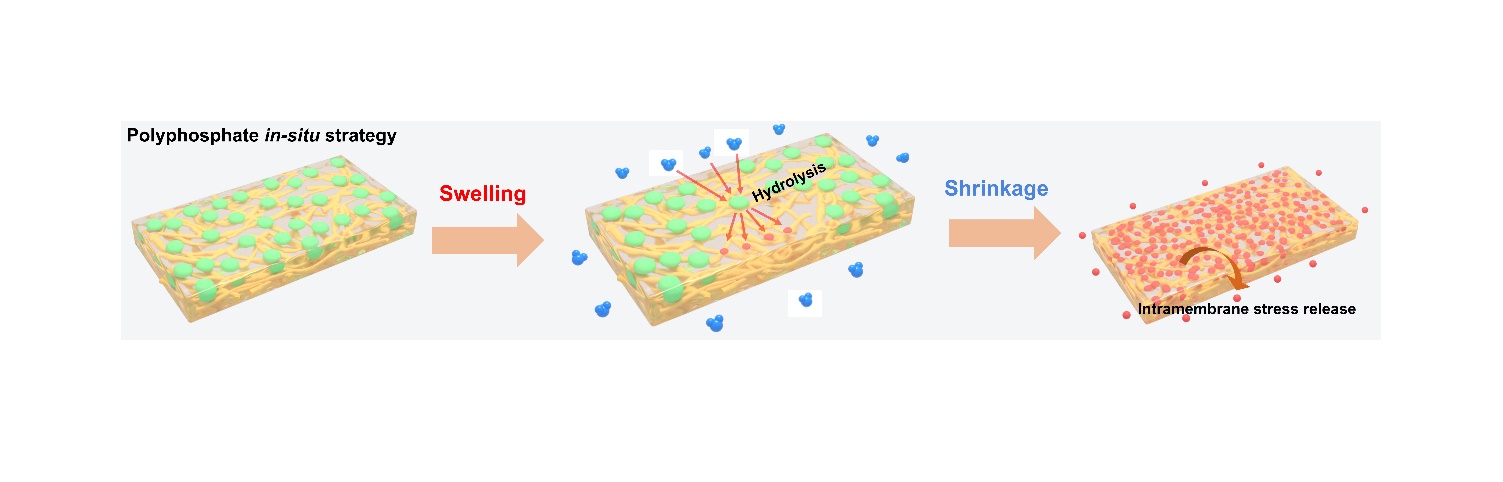


**Figure S2 Phosphoric acid loss for commercial Celtec®-P membranes.** Schematic illustration of spontaneous loss of phosphoric acid using polyphosphate *in-situ* strategy.


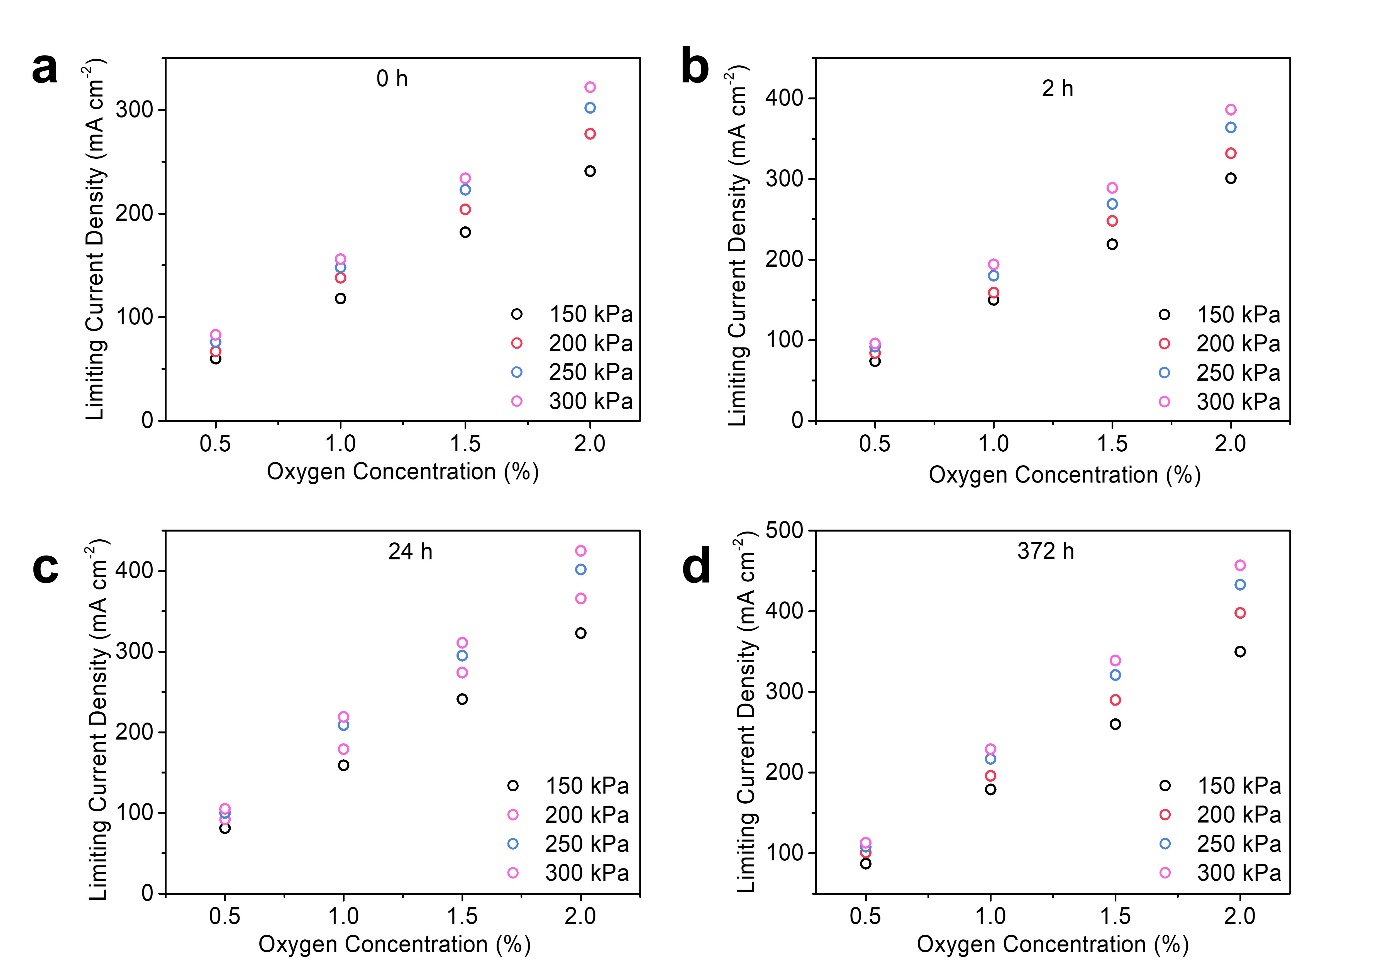


**Figure S3 Limiting current density of MEA.** Limiting current density during oxygen transport resistance testing of PA/OPBI membranes at intramembrane stress release time of 0 (a), 2 (b), 24 (c) and 372 h (d).

**Figure S4 Polarization curves for calculation of limiting current density.** Polarization curves under different back pressure with diluted oxygen as oxidant as indicated in the figure for MEAs assembled from membranes with various stress release time of 0 (a), 2 (b), 24 (c) and 372 h (d).


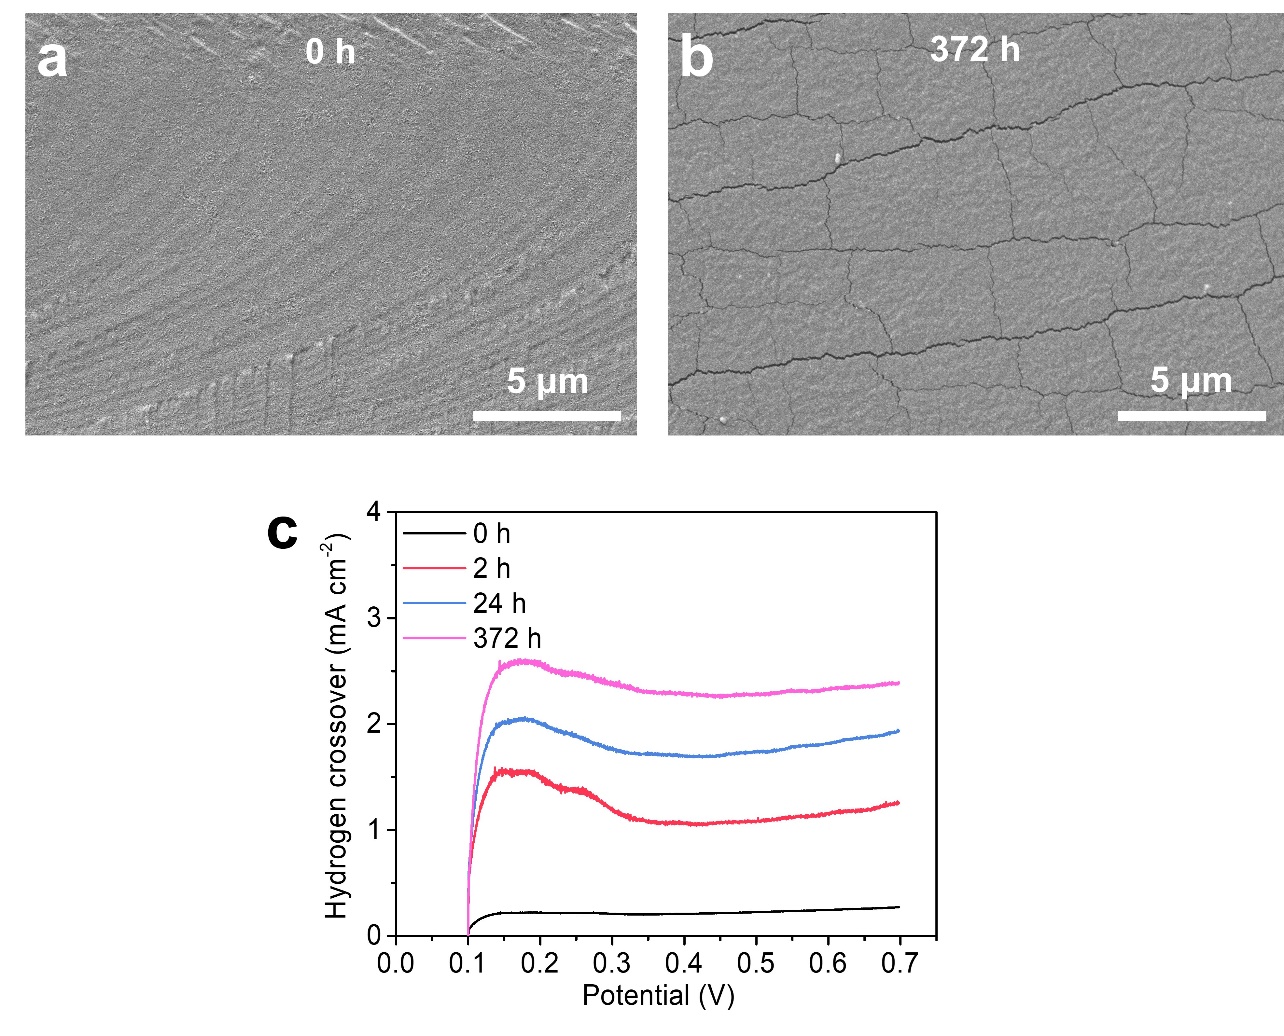


**Figure S5 Morphology and hydrogen crossover of membranes.** Cross-sectional SEM images of PA/OPBI membranes prepared by PA immersion strategy at intramembrane stress release time of 0 (a) and 372 h (b), .Hydrogen crossover current density (c) of HT-PEMFCs assembled with PA/OPBI membranes at intramembrane stress release time of 0, 2, 24 and 372 h.


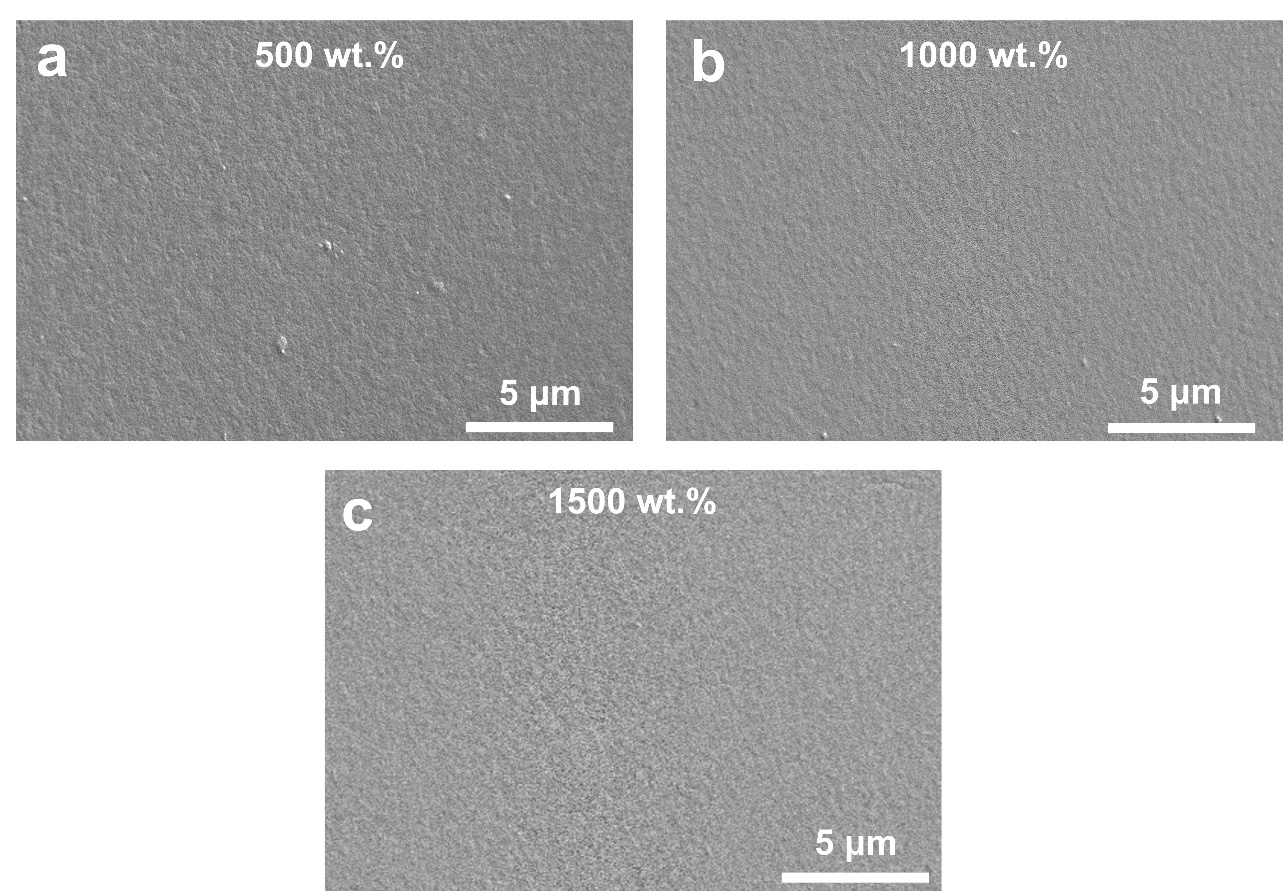


**Figure S6 Morphology of Membranes.** Cross-sectional SEM images of phosphoric acid-doped OPBI membranes prepared by *in-situ* solution casting strategy with phosphoric acid doping content of 500 (a) and 1000 (b) and 1500 wt.% (c).


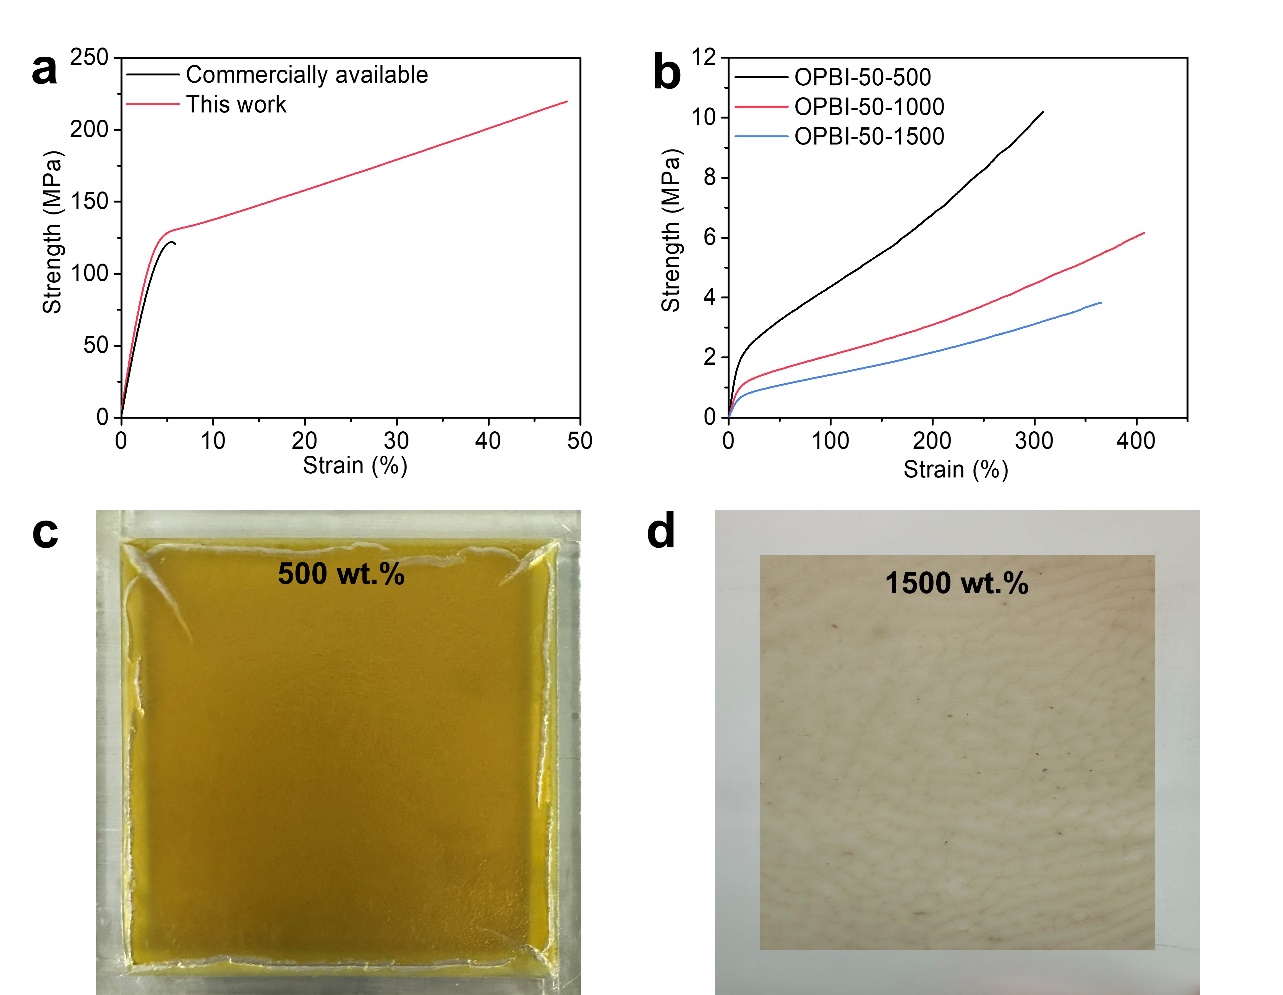


**Figure S7 Properties of OPBI-*x*-*y* membranes. (a)** Stress-strain curves of OPBI membranes using synthesized OPBI and commercial OPBI. (**b**) Stress-strain curves of OPBI-x-y membranes with similar membrane thickness and different phosphoric acid contents. (**c**) Optical photographs using commercial OPBI and ultra-high molecular OPBI (**d**) of phosphoric acid-doped OPBI membranes prepared by *in-situ* solution casting strategy.


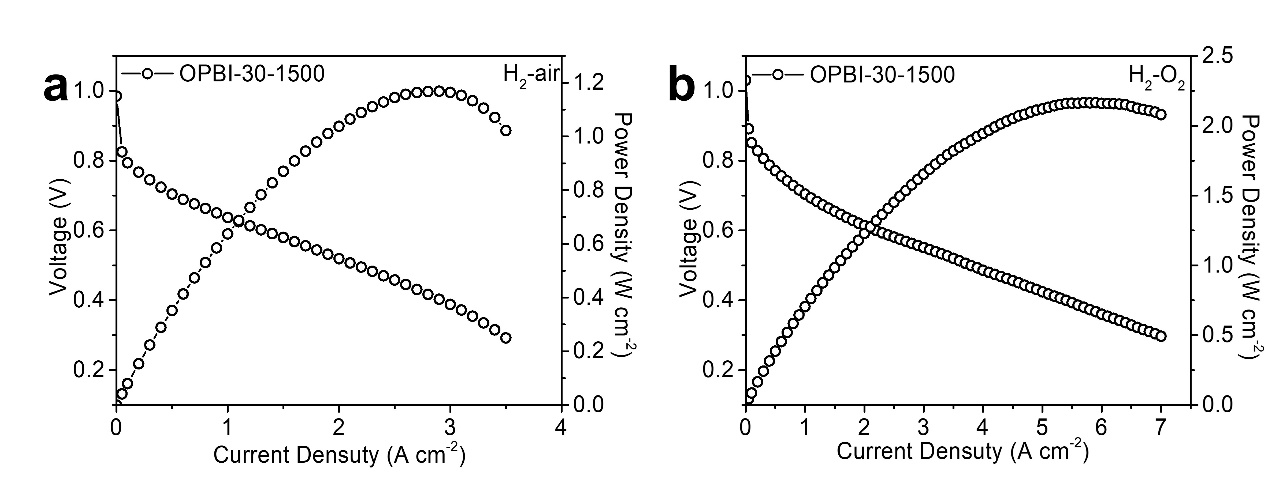


**Figure S8 Single cell performance.** Polarization and power density curves of the HT-PEMFCs assembled with OPBI-30-1500 membrane, depicted under H2-air (**a**) and H2-O2 (**b**) fuel supplies at 160 oC with backpressure of 200 kPa and stoichiometric of 1.5 and 2.


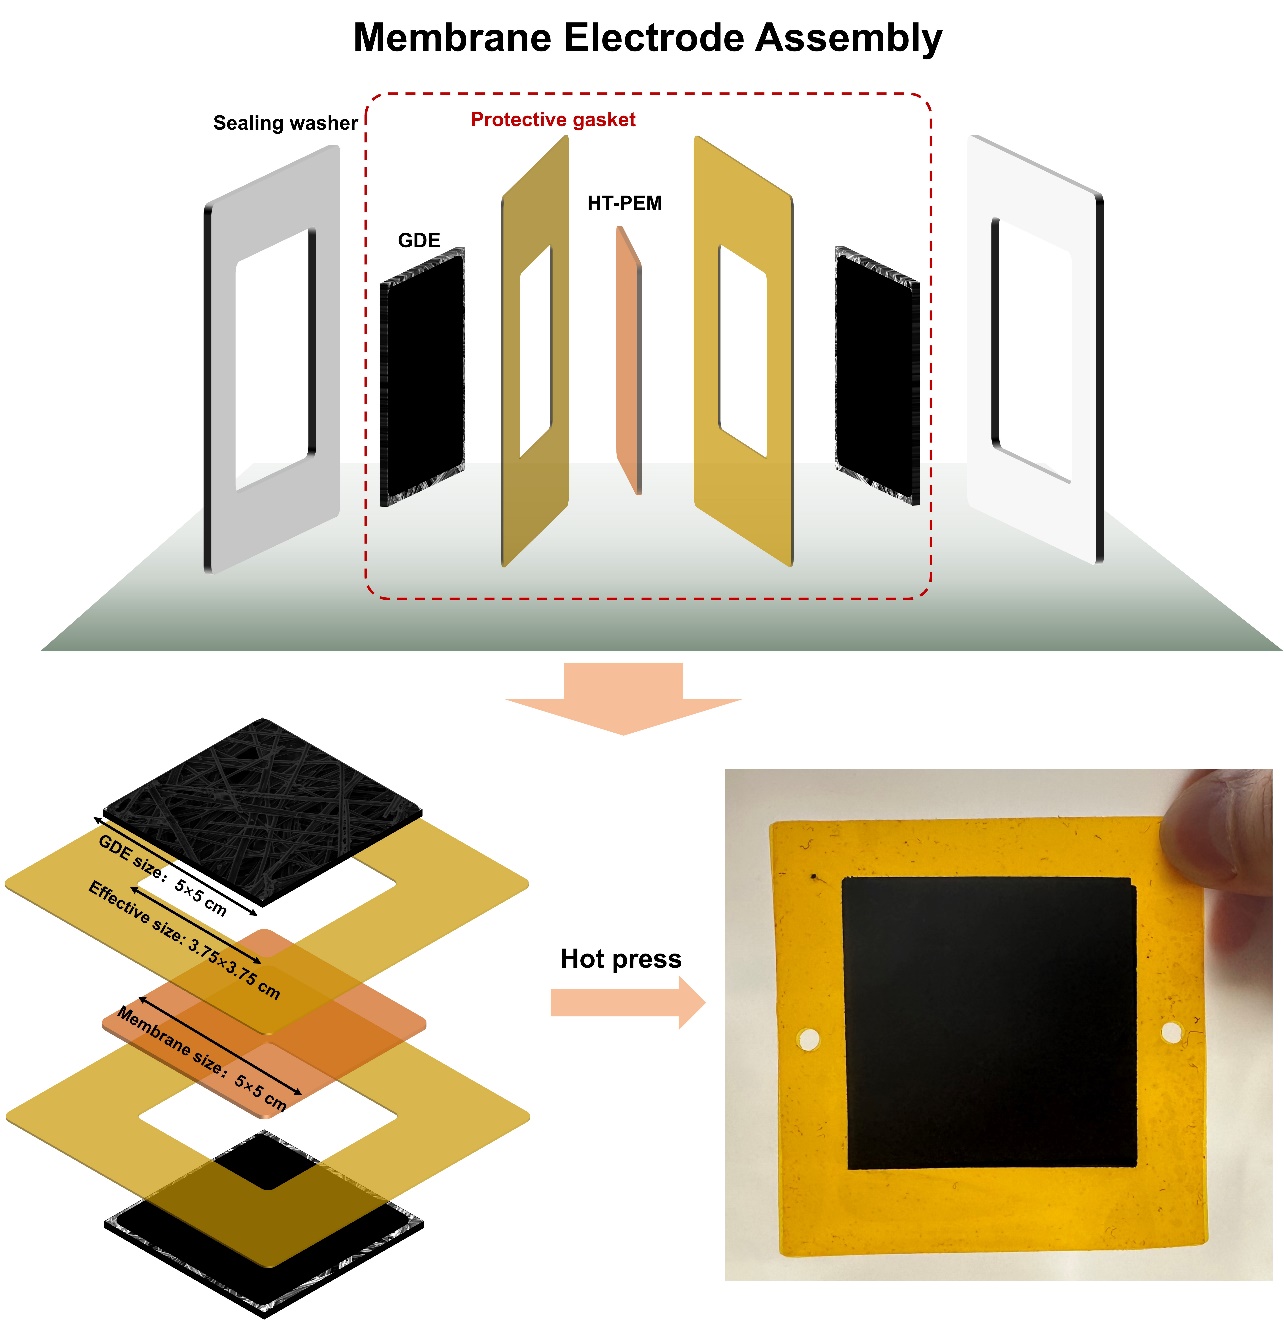


**Figure S9 MEA fabrication.** Schematic diagram and optical photograph of the composition and specific dimensions of the membrane electrode assembly in this work.

**SUPPLEMENTARY TABLE**

**Table S1 |** Molecular weight of commercially available OPBI and ultra-high molecular weight OPBI in this work.

| Sample | Number-average molecular weight (g mol-1) | Weight-average Molecular Weight (g mol-1) | Z-average molecular weight (g mol-1) |
| --- | --- | --- | --- |
| Commercially available | 66462 | 929362 | 3919173 |
| This work | 177685 | 4347773 | 17107292 |
